# Supplementary material for: Exploring Blueberry Aroma Complexity by Chromatographic and Direct-Injection Spectrometric Techniques
Source: Front Plant Sci. 2017 Apr 26;8:617. doi: 10.3389/fpls.2017.00617 (PMC5405137; doi:10.3389/fpls.2017.00617)
Supplement: Supplementary Table 2 — Volatile compounds identified by PTR-ToF-MS sorted based on SOTA clustering. [file Table2.XLSX]

## Sheet: Foglio1
SOTA	m/z	Formula	Tentative identification
1	28.008		n.i.
1	30.9953		n.i.
1	33.9939	O[18]O+	n.i.
1	45.9922	NO2+	n.i.
1	47.0241		n.i.
1	55.9343		n.i.
1	73.0281	C3H4O2H+	n.i.
1	73.0482		n.i.
1	75.0272	C3H6SH+	Allyl mercaptan, 3-mercaptopropanol
1	78.0465	C6H6+	n.i.
1	90.9488		n.i.
1	91.0566	C7H7+	Benzyl Alcohol*
1	93.0366	C3H8OSH+	n.i.
1	94.0405		n.i.
1	95.0221		n.i.
1	95.0489	C6H6OH+	Phenol
1	95.0862	C7H11+	(E)-2-Heptenal*, Monoterpene fragment
1	105.938		n.i.
1	107.086	C8H10H+	Ethyl Benzene*, p-Xylene*, m-Xylene*
1	107.953		n.i.
1	108.957		n.i.
1	111.118	C8H15+	(E)-2-Octenal*, Octanal*,1-Octen-3-ol
1	113.097	C7H12OH+	(E)-2-Heptenal*
1	119.088	C9H11+	3-Phenylpropanol
1	121.103	C9H13+	1,3,5-Trimethylbenzene
1	123.118	C9H15+	2-Nonenal*, (E)-2-Nonenal*
1	126.903		n.i.
1	129.128	C8H16OH+	2-Octanone*, Octanal*, 1-Octen-3-ol
1	133.102	C10H13+	Thymol
1	139.076	C8H10O2H+	5,5-Dimethyl-2-cyclohexen-1,4-dione
1	141.129	C9H16OH+	2-Nonenal*, (E)-2-Nonenal*, Ethyl sorbate
1	144.914		n.i.
1	145.124	C8H16O2H+	Ethyl Hexanoate*, Hexyl Acetate*, Octanoic Acid*
1	159.14	C9H18O2H+	Nonanoic Acid*
1	173.156	C10H20O2H+	Decanoic Acid*
1	177.166	C13H21+	Geranyl Acetone*
2	49.0115	CH4SH+	Methanethiol
2	55.0179		n.i.
2	55.0542	C4H7+	common fragment
2	69.0335	C4H4OH+	furan
2	71.0492	C4H6OH+	Butenal
2	73.0649	C4H8OH+	Butanale, Isobutyraldehyde
2	83.0492	C5H6OH+	Methylfuran
2	107.05	C7H6OH+	Benzaldehyde*
2	113.027		n.i.
2	115.077	C6H10O2H+	Ethyl Crotonate (Ethyl (2E)-2-butenoate)*
2	121.066	C8H8OH+	Acetophenone*, Phenylacetaldehyde
2	139.115	C9H14OH+	n.i.
3	39.023	C3H3+	common fragment
3	41.0388	C3H5+	common fragment
3	43.0184	C2H3O+	common fragment
3	43.0544	C3H7+	common fragment
3	53.0388	C4H5+	n.i.
3	57.0704	C4H9+	1-Octanol*, high alcohol fragment
3	65.0389	C5H5+	n.i.
3	67.0542	C5H7+	n.i.
3	69.0699	C5H9+	Aldehyde fragment
3	70.0387		n.i.
3	79.0545	C6H7+	Benzene
3	80.0601	C5[13]CH7+	n.i.
3	87.0441	C4H6O2H+	Butyrolactone*
3	87.0803	C5H10OH+	2-Methyl butanal*, 3-Methyl butanal*
3	97.102	C7H13+	Heptanal*, fragment
3	99.0804	C6H10OH+	(Z)-3-Hexenal*, (lZ)-2-Hexenal*, (E)-2-Hexenal*
3	101.064	C5H8O2H+	2,3-Pentanedione
3	111.081	C7H10OH+	(E,E)-2,4-Heptadienal*
3	125.097	C8H12OH+	6-Methyl-3,5-heptadien-2-one
3	137.134	C10H17+	1,8-cineole*, Linalool*, 4-Terpineol*, alpha Terpineol*, Nerol*, Geraniol*
3	143.108	C8H14O2H+	(Z)-3-Hexenyl Acetate*, 2-Hexenyl Acetate*
3	143.145	C9H18OH+	2-Nonanone*, Nonanal
4	63.0263	C2H6SH+	Dimethyl sulfide, Ethanethiol
4	65.0223		n.i.
4	71.0856	C5H11+	3-Methyl-1-butanol*, 2-Methyl-1-butanol*, Pentanol*
4	81.0697	C6H9+	Fragment of aldehydes (Hexenals); fragment of terpenes( Linalool)
4	85.065	C5H8OH+	n.i.
4	97.0653	C6H8OH+	(E,Z)-2,4-Hexadienal*, (E,E)-2,4-Hexadienal*
4	113.06	C6H8O2H+	Sorbic acid
4	115.113	C7H14OH+	2-Heptanone*, Heptanal
5	47.0125	CH3O2+	Formic acid
5	57.0333	C3H4OH+	common fragment
5	83.0859	C6H11+	(E)-3-Hexen-1-ol*, (Z)-3-Hexen-1-ol*, (Z)-2-Hexen-1-ol*, Hexanal*,2-Hexanone
5	101.095	C6H12OH+	Hexanal*
5	109.102	C8H13+	n.i.
5	127.113	C8H14OH+	1-Octen-3-one*, 6-Methyl-5-hepten-2-one*, (E)-2-Octenal*, Beta Myrcene*, Limonene*, (E)-Beta Ocimene*, Alpha Terpinolene*
5	155.144	C10H18OH+	1,8-Cineole*, Linalool*, 4-Terpineol*, alpha Terpineol*, Nerol*, Geraniol*
6	51.0226		n.i.
6	61.028	C2H4O2H+	Acetic acid, common ester fragment
6	85.1002	C6H13+	Hexanol*
6	93.0696	C7H9+	Monoterpene fragment
6	105.071	C8H9+	Phenetyl Alcohol*, Styrene
7	59.0488	C3H6OH+	Acetone
7	135.118	C10H15+	HO-Trienol*
7	153.129	C10H16OH+	HO-Trienol*, 2,4-Decadienal
8	29.0401	C2H5+	Ethanol fragment
8	31.0185	CH3O+	Formaldehyde
8	34.0374	[13]CH4OH+	Methanol
8	45.0334	C2H4OH+	Acetaldehyde
8	47.0488	C2H6OH+	Ethanol
8	51.0431	CH3OH*H3O+	Methanol cluster
8	63.0434	C2H4O*H3O+	Ethanol cluster
8	75.0439	C3H6O2H+	Methyl Acetate*
8	89.0596	C4H8O2H+	Ethyl Acetate*
8	103.076	C5H10O2H+	Ethyl Propanoate*
8	117.092	C6H12O2H+	Ethyl Isobutanoate*, Methyl-2-methyl butanoate*, Methyl Isovalerate*, Ethyl Butyrate*, Hexanoic Acid*
8	131.107	C7H14O2H+	Ethyl-2-methyl Butanoate*, Ethyl Isovalerate*
